# Supplementary material for: Effects of triphenyl phosphate on the hydrogen storage performance of the Mg(NH2)2–2LiH system
Source: Royal Society of Chemistry journal article supplement (doi:10.1039/b812653d), 2009-01-01
Supplement: b812653d.pdf [file b812653d.pdf]

## Supporting information

DSC technique was applied to collect the temperatures ( $T_p$ ) at the maximum reaction rate at various heating rates ( $\beta = 1, 2, 3$  and  $4 \text{ K min}^{-1}$ ). Kissinger's method was adopted in determining the activation energy ( $E_a$ ) and the pre-exponential factor ( $A$ ):

$$E_a = -R \frac{d(\ln(\beta/T_p^2))}{d(1/T_p)}$$

$$A = \beta E_a \exp(E_a/RT_p^2)/RT_p^2$$

The reaction rate constant can be obtained by Arrhenius equation:

$$K = A \exp(E_a/RT_p)$$

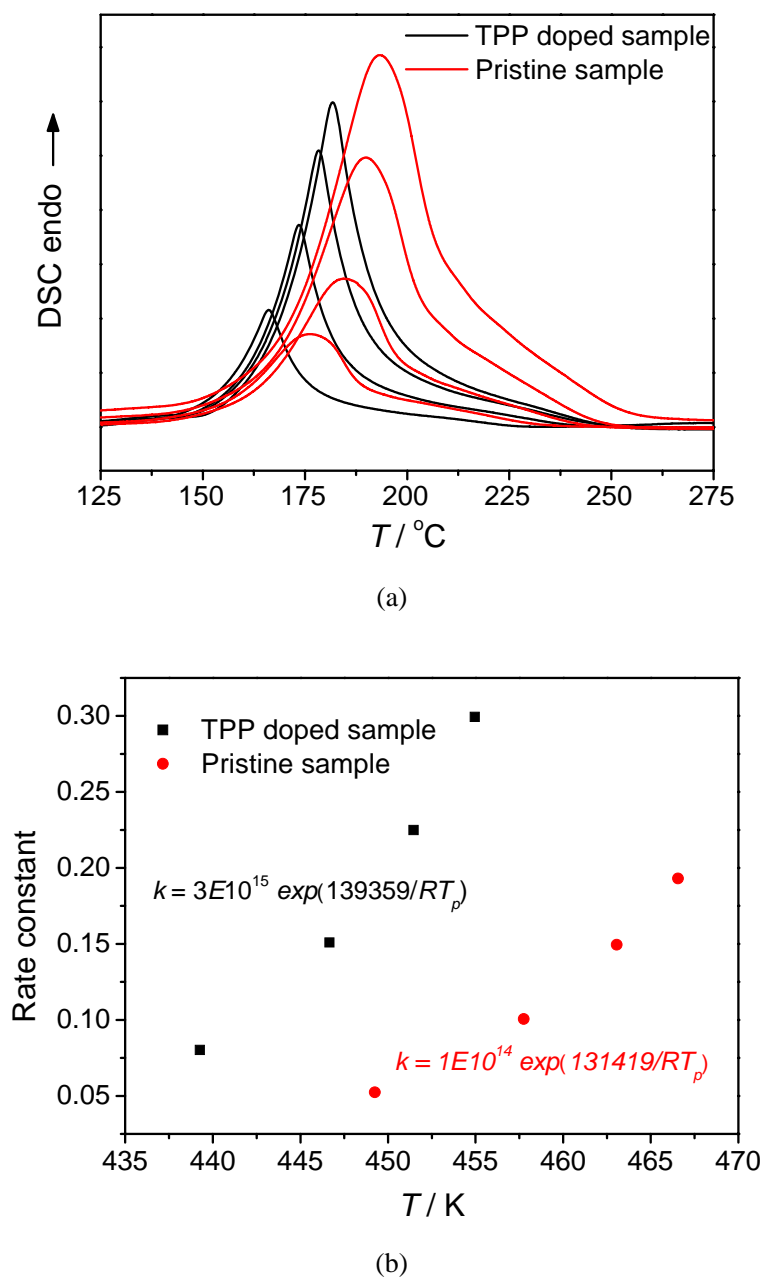

Fig. S1 (a) DSC curves of the TPP-doped and pristine  $1\text{Mg}(\text{NH}_2)_2\cdot 2\text{LiH}$  sample measured at different heat rates: 1, 2, 3 and 4  $\text{K min}^{-1}$ . (b) The reaction rate constants dependent of

temperatures for the TPP-doped sample and pristine sample. The rate constants of TPP-doped sample are almost three times the values of pristine sample in the testing temperature range.

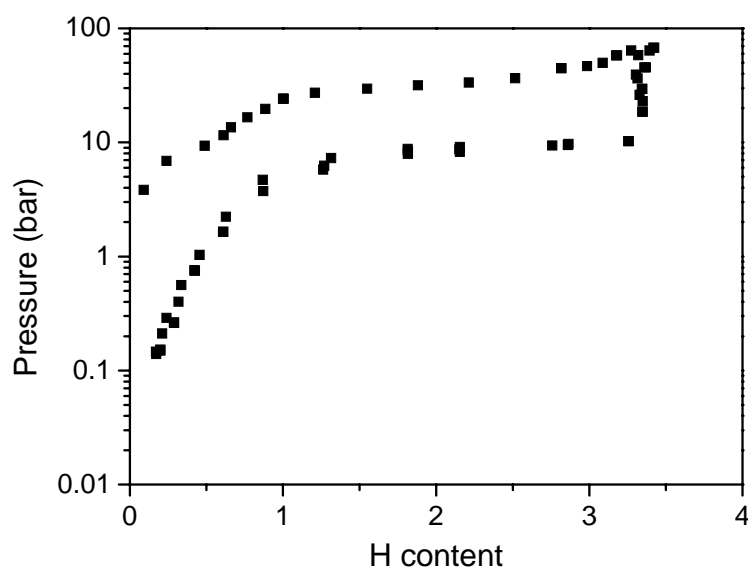

Fig. S2 Pressure-composition-temperature (PCT) isotherms of the TPP-doped  $1\text{Mg}(\text{NH}_2)_2\text{-}2\text{LiH}$  at  $170\text{ }^\circ\text{C}$ .

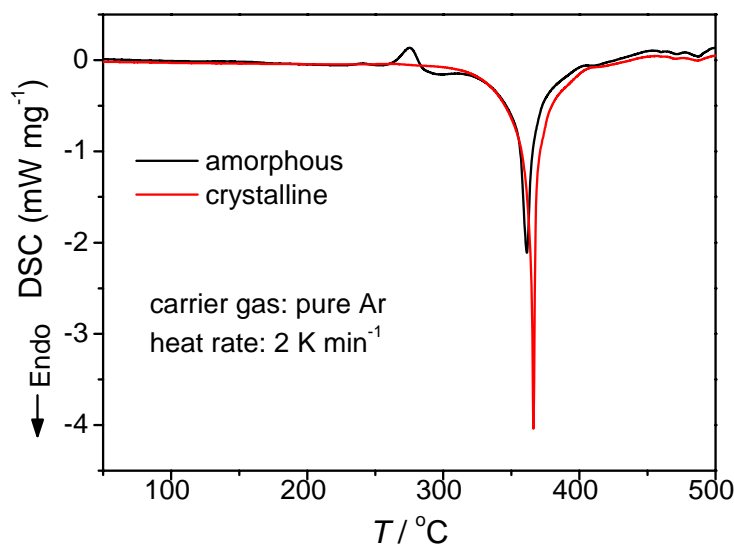

Fig. S3 DSC curves of amorphous and crystalline  $\text{Mg}(\text{NH}_2)_2$ . Amorphous  $\text{Mg}(\text{NH}_2)_2$  was prepared by ball milling the crystalline  $\text{Mg}(\text{NH}_2)_2$  for 36h. The exothermic peak around  $275\text{ }^\circ\text{C}$  should be ascribed to the amorphous-crystalline transition of  $\text{Mg}(\text{NH}_2)_2$ . But it's hard to get a precise value of heat of crystallization because this change somehow overlaps the decomposition of  $\text{Mg}(\text{NH}_2)_2$ .
